# Supplementary material for: Voluntary Running Improves Behavioral and Structural Abnormalities in a Mouse Model of CDKL5 Deficiency Disorder
Source: Preprints.org preprint supplement (doi:10.20944/preprints202307.1396.v2), 2023-09-07
Supplement: Supplementary file 2 [file supplementary]

Archive with 4 entries (4 files):
- Figure S1.pdf
- Table S1.pdf
- Table S2.pdf
- Table S3.pdf
