# Supplementary material for: Voluntary Running Improves Behavioral and Structural Abnormalities in a Mouse Model of CDKL5 Deficiency Disorder
Source: Preprints.org preprint supplement (doi:10.20944/preprints202307.1396.v2), 2023-09-07
Supplement: Supplementary file 2 [file supplementary › Figure S1.pdf]

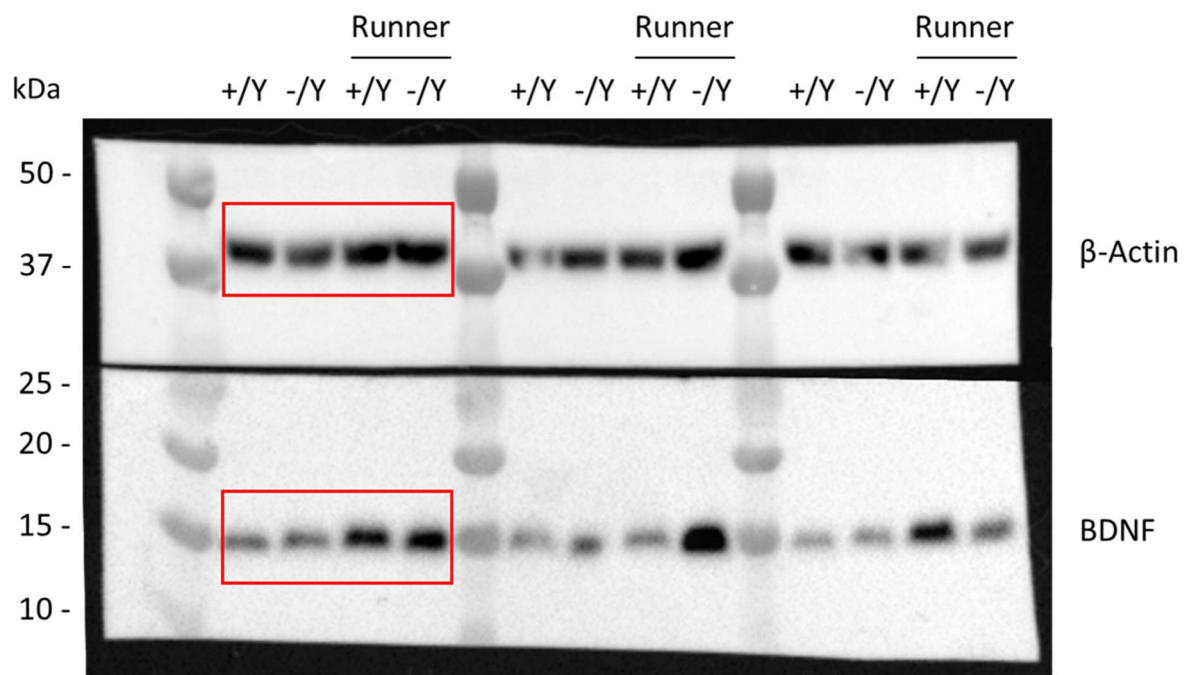

**Figure S1.** Image of the parts of the membrane, between 50 and 25 kDa and 25 and 10 kDa, separately incubated with the anti-β-Actin and the anti-BDNF antibodies. The red boxes indicate the parts of the image shown in Figure 6D.
