# Supplementary material for: Voluntary Running Improves Behavioral and Structural Abnormalities in a Mouse Model of CDKL5 Deficiency Disorder
Source: Preprints.org preprint supplement (doi:10.20944/preprints202307.1396.v2), 2023-09-07
Supplement: Supplementary file 2 [file supplementary › Table S1.pdf]

|        |     |          |           | Behavioral testing |                    |                   | Body weight |
|--------|-----|----------|-----------|--------------------|--------------------|-------------------|-------------|
| Cohort | Sex | Genotype | Treatment | Hind-Limb Clapping | Object Exploration | Passive Avoidance |             |
| 1      | M   | +Y       | NO RUN    | ✓                  | -                  | ✓                 | -           |
| 1      | M   | +Y       | NO RUN    | ✓                  | -                  | ✓                 | -           |
| 1      | M   | +Y       | NO RUN    | ✓                  | -                  | ✓                 | -           |
| 1      | M   | +Y       | NO RUN    | ✓                  | -                  | ✓                 | ✓           |
| 1      | M   | +Y       | NO RUN    | ✓                  | -                  | ✓                 | ✓           |
| 1      | M   | +Y       | NO RUN    | ✓                  | -                  | ✓                 | ✓           |
| 1      | M   | +Y       | NO RUN    | ✓                  | -                  | ✓                 | ✓           |
| 1      | M   | +Y       | NO RUN    | ✓                  | -                  | ✓                 | ✓           |
| 2      | M   | +Y       | NO RUN    | ✓                  | ✓                  | ✓                 | ✓           |
| 2      | M   | +Y       | NO RUN    | ✓                  | ✓                  | ✓                 | ✓           |
| 2      | M   | +Y       | NO RUN    | ✓                  | ✓                  | ✓                 | ✓           |
| 3      | M   | +Y       | NO RUN    | -                  | ✓                  | ✓                 | -           |
| 3      | M   | +Y       | NO RUN    | -                  | ✓ Outlier          | ✓                 | -           |
| 3      | M   | +Y       | NO RUN    | -                  | ✓                  | ✓                 | -           |
| 3      | M   | +Y       | NO RUN    | -                  | ✓                  | ✓                 | -           |
| 4      | M   | +Y       | NO RUN    | ✓                  | ✓                  | ✓                 | ✓           |
| 4      | M   | +Y       | NO RUN    | ✓                  | ✓                  | ✓                 | ✓           |
| 4      | M   | +Y       | NO RUN    | ✓                  | ✓                  | ✓                 | ✓           |
| 5      | M   | +Y       | NO RUN    | ✓                  | ✓                  | ✓                 | ✓           |
| 5      | M   | +Y       | NO RUN    | ✓                  | ✓                  | ✓                 | ✓           |
| 5      | M   | +Y       | NO RUN    | ✓                  | ✓                  | ✓                 | ✓           |
| 5      | M   | +Y       | NO RUN    | ✓                  | ✓                  | ✓                 | ✓           |
| 1      | M   | -Y       | NO RUN    | ✓                  | -                  | ✓                 | ✓           |
| 1      | M   | -Y       | NO RUN    | ✓                  | -                  | ✓                 | ✓           |
| 1      | M   | -Y       | NO RUN    | ✓                  | -                  | ✓                 | ✓           |
| 1      | M   | -Y       | NO RUN    | ✓                  | -                  | ✓                 | ✓           |
| 2      | M   | -Y       | NO RUN    | ✓                  | ✓                  | ✓                 | ✓           |
| 3      | M   | -Y       | NO RUN    | -                  | ✓                  | ✓                 | -           |
| 3      | M   | -Y       | NO RUN    | -                  | ✓                  | ✓                 | -           |
| 3      | M   | -Y       | NO RUN    | -                  | ✓                  | ✓                 | -           |
| 3      | M   | -Y       | NO RUN    | -                  | ✓                  | ✓                 | -           |
| 3      | M   | -Y       | NO RUN    | -                  | ✓                  | ✓                 | -           |
| 3      | M   | -Y       | NO RUN    | -                  | ✓                  | ✓                 | -           |
| 4      | M   | -Y       | NO RUN    | ✓                  | ✓ Outlier          | ✓                 | ✓           |
| 4      | M   | -Y       | NO RUN    | ✓                  | ✓                  | ✓                 | ✓           |
| 4      | M   | -Y       | NO RUN    | ✓                  | ✓                  | ✓                 | ✓           |
| 6      | M   | -Y       | NO RUN    | ✓                  | ✓                  | ✓                 | ✓           |
| 6      | M   | -Y       | NO RUN    | ✓                  | ✓                  | ✓                 | ✓           |
| 6      | M   | -Y       | NO RUN    | ✓                  | ✓                  | ✓                 | ✓           |
| 4      | M   | +Y       | RUN       | ✓                  | ✓                  | ✓                 | ✓           |
| 4      | M   | +Y       | RUN       | ✓                  | ✓                  | ✓                 | ✓           |
| 4      | M   | +Y       | RUN       | ✓                  | ✓                  | ✓                 | ✓           |
| 4      | M   | +Y       | RUN       | ✓                  | ✓                  | ✓                 | ✓           |
| 5      | M   | +Y       | RUN       | ✓                  | ✓                  | ✓                 | ✓           |
| 5      | M   | +Y       | RUN       | ✓                  | ✓                  | ✓ Outlier         | ✓           |
| 5      | M   | +Y       | RUN       | ✓                  | ✓                  | ✓                 | ✓           |
| 5      | M   | +Y       | RUN       | ✓ Outlier          | ✓                  | ✓                 | ✓           |
| 1      | M   | -Y       | RUN       | ✓                  | -                  | -                 | ✓           |
| 1      | M   | -Y       | RUN       | ✓                  | -                  | -                 | ✓           |
| 1      | M   | -Y       | RUN       | ✓                  | -                  | -                 | ✓           |
| 1      | M   | -Y       | RUN       | ✓                  | -                  | ✓                 | ✓           |
| 2      | M   | -Y       | RUN       | ✓                  | ✓                  | ✓                 | ✓           |
| 2      | M   | -Y       | RUN       | ✓                  | ✓                  | ✓                 | ✓           |
| 2      | M   | -Y       | RUN       | ✓                  | ✓ Outlier          | ✓                 | ✓           |
| 2      | M   | -Y       | RUN       | ✓                  | ✓                  | ✓                 | ✓           |
| 6      | M   | -Y       | RUN       | ✓                  | ✓                  | ✓                 | ✓           |
| 6      | M   | -Y       | RUN       | ✓                  | ✓                  | ✓                 | ✓           |
| 6      | M   | -Y       | RUN       | ✓                  | ✓                  | ✓                 | ✓           |
| 6      | M   | -Y       | RUN       | ✓                  | ✓                  | ✓                 | ✓           |

**Table S1.** Mouse cohorts used for behavioral tests. For each mouse cohort (1-6) used in the present study: genotype (wild type: +Y or *Cdkl5* KO: -Y), type of treatment (sedentary: NO RUN or runner: RUN) and type of behavioral test (performed: ✓ or not performed: -) are reported.
