# Supplementary material for: Voluntary Running Improves Behavioral and Structural Abnormalities in a Mouse Model of CDKL5 Deficiency Disorder
Source: Preprints.org preprint supplement (doi:10.20944/preprints202307.1396.v2), 2023-09-07
Supplement: Supplementary file 2 [file supplementary › Table S2.pdf]

| Primary antibodies                    |                   |           |                          |                |
|---------------------------------------|-------------------|-----------|--------------------------|----------------|
| Target                                | Description       | Dilution  | Manufacturer             | Catalog number |
| AIF-1                                 | Rabbit polyclonal | IHC 1:300 | Thermo Fisher Scientific | PA5-21274      |
| DCX                                   | Rabbit polyclonal | IHC 1:300 | Thermo Fisher Scientific | 48-1200        |
| BrdU                                  | Rat monoclonal    | IHC 1:200 | Abcam                    | ab1893         |
| BDNF                                  | Rabbit polyclonal | IHC 1:200 | Alomone Labs             | ANT-010        |
| BDNF                                  | Rabbit polyclonal | WB 1:500  | Santa Cruz Biotechnology | sc-546         |
| $\beta$ -Actin                        | Mouse monoclonal  | WB 1:5000 | Sigma-Aldrich            | A5441          |
| Secondary antibodies                  |                   |           |                          |                |
| Description                           |                   | Dilution  | Manufacturer             | Catalog number |
| Donkey anti-Rabbit IgG Cy3-conjugated |                   | IHC 1:200 | Jackson ImmunoResearch   | 711-165-152    |
| Goat anti-Rat IgG Cy3-conjugated      |                   | IHC 1:200 | Jackson ImmunoResearch   | 112-165-143    |
| Goat anti-Rabbit IgG HRP-conjugated   |                   | WB 1:5000 | Jackson ImmunoResearch   | 111-035-003    |
| Goat anti-Mouse IgG HRP-conjugated    |                   | WB 1:5000 | Jackson ImmunoResearch   | 115-035-003    |

**Table S2. List of primary and secondary antibodies.** IHC = immunohistochemistry; WB = western blotting.
